# Supplementary material for: Nitric oxide-dependent anaerobic ammonium oxidation
Source: PubMed Central journal article supplement (PMC6423088; doi:10.1038/s41467-019-09268-w), 2019-03-18
Supplement: 41467_2019_9268_MOESM2_ESM.pdf [file 41467_2019_9268_MOESM2_ESM.pdf]

## **Description of Additional Supplementary Files**

File Name: Supplementary Data 1

Description: Up-regulation of *Kuenenia stuttgartiensis* gene transcription in the reactor growing on NO and ammonium (Reactor III) compared to the reactor growing on nitrite and ammonium (Reactor I)

File Name: Supplementary Data 2

Description: Down-regulation of *Kuenenia stuttgartiensis* gene transcription in the reactor growing on NO and ammonium (Reactor III) compared to the reactor growing on nitrite and ammonium (Reactor I)
